# Supplementary material
Source: publisher figshare collection journal article supplement (https://karger.figshare.com/ndownloader/files/33157163)
Supplement: Supplementary file 1 [file 33157163]

**Table S2 (online supplementary material).** Summary of logistic regression analysis predicting remission status at post-treatment

|  | Remission versus non-remission | | |
| --- | --- | --- | --- |
| Predictor | *B* | *SE B* | *Odds Ratio (eB)* |
| Age | -0.00 | .02 | 1.00 |
| Sex a | 0.16 | .29 | 1.17 |
| Educational level b | 1.28 | 1.78 | 3.59 |
| Employment status c | -1.18 | .41 | 0.31** |
| Relationship status d | 0.27 | .30 | 1.31 |
| Socio-economic status | 0.02 | .05 | 1.02 |
| Y-BOCSbaseline | -0.11 | .03 | 0.91** |
| Age at onset | 0.01 | .02 | 1.01 |
| Hoarding symptoms e | -0.59 | .36 | 0.55 |
| Comorbid mood or anxiety disorder e | 0.18 | .33 | 1.20 |
| Comorbid PD e | -0.64 | .41 | 0.53 |
| Psychotropic medication e  before starting CBT | 1.09 | .32 | 2.97** |
| BDI-IIbaseline | -0.01 | .02 | 1.00 |
| GAFbaseline | 0.01 | .02 | 1.01 |
| Treatment units | 0.00 | .01 | 1.00 |
| Constant | -0.01 |  |  |
| *χ2* | 59.23 | | |
| *Df* | 17 | | |
| % reached remission | 49.8 | | |

*Note.* The analysis sample comprised *n* = 275 patients with OCD with complete data on the variables used in this analysis. *eB* = exponentiated B (odds ratio); Y-BOCS = Yale-Brown Obsessive-Compulsive Scale; PD = personality disorder; BDI-II = Beck Depression Inventory II; GAF = Global Assessment of Functioning; OCD = obsessive-compulsive disorder.
a No school degree is the reference category. b Male = 0, female = 1. c Unemployed: no = 0, yes = 1. d Living in a relationship: yes = 0, no = 1. e No = 0, yes = 1.
**p* < .05. ***p* < .01.
